# Supplementary material for: Impact of host age on viral and bacterial communities in a waterbird population
Source: PubMed Central journal article supplement (PMC9860062; doi:10.1038/s41396-022-01334-4), 2022-11-01
Supplement: 41396_2022_1334_MOESM15_ESM.pdf [file 41396_2022_1334_MOESM15_ESM.pdf]

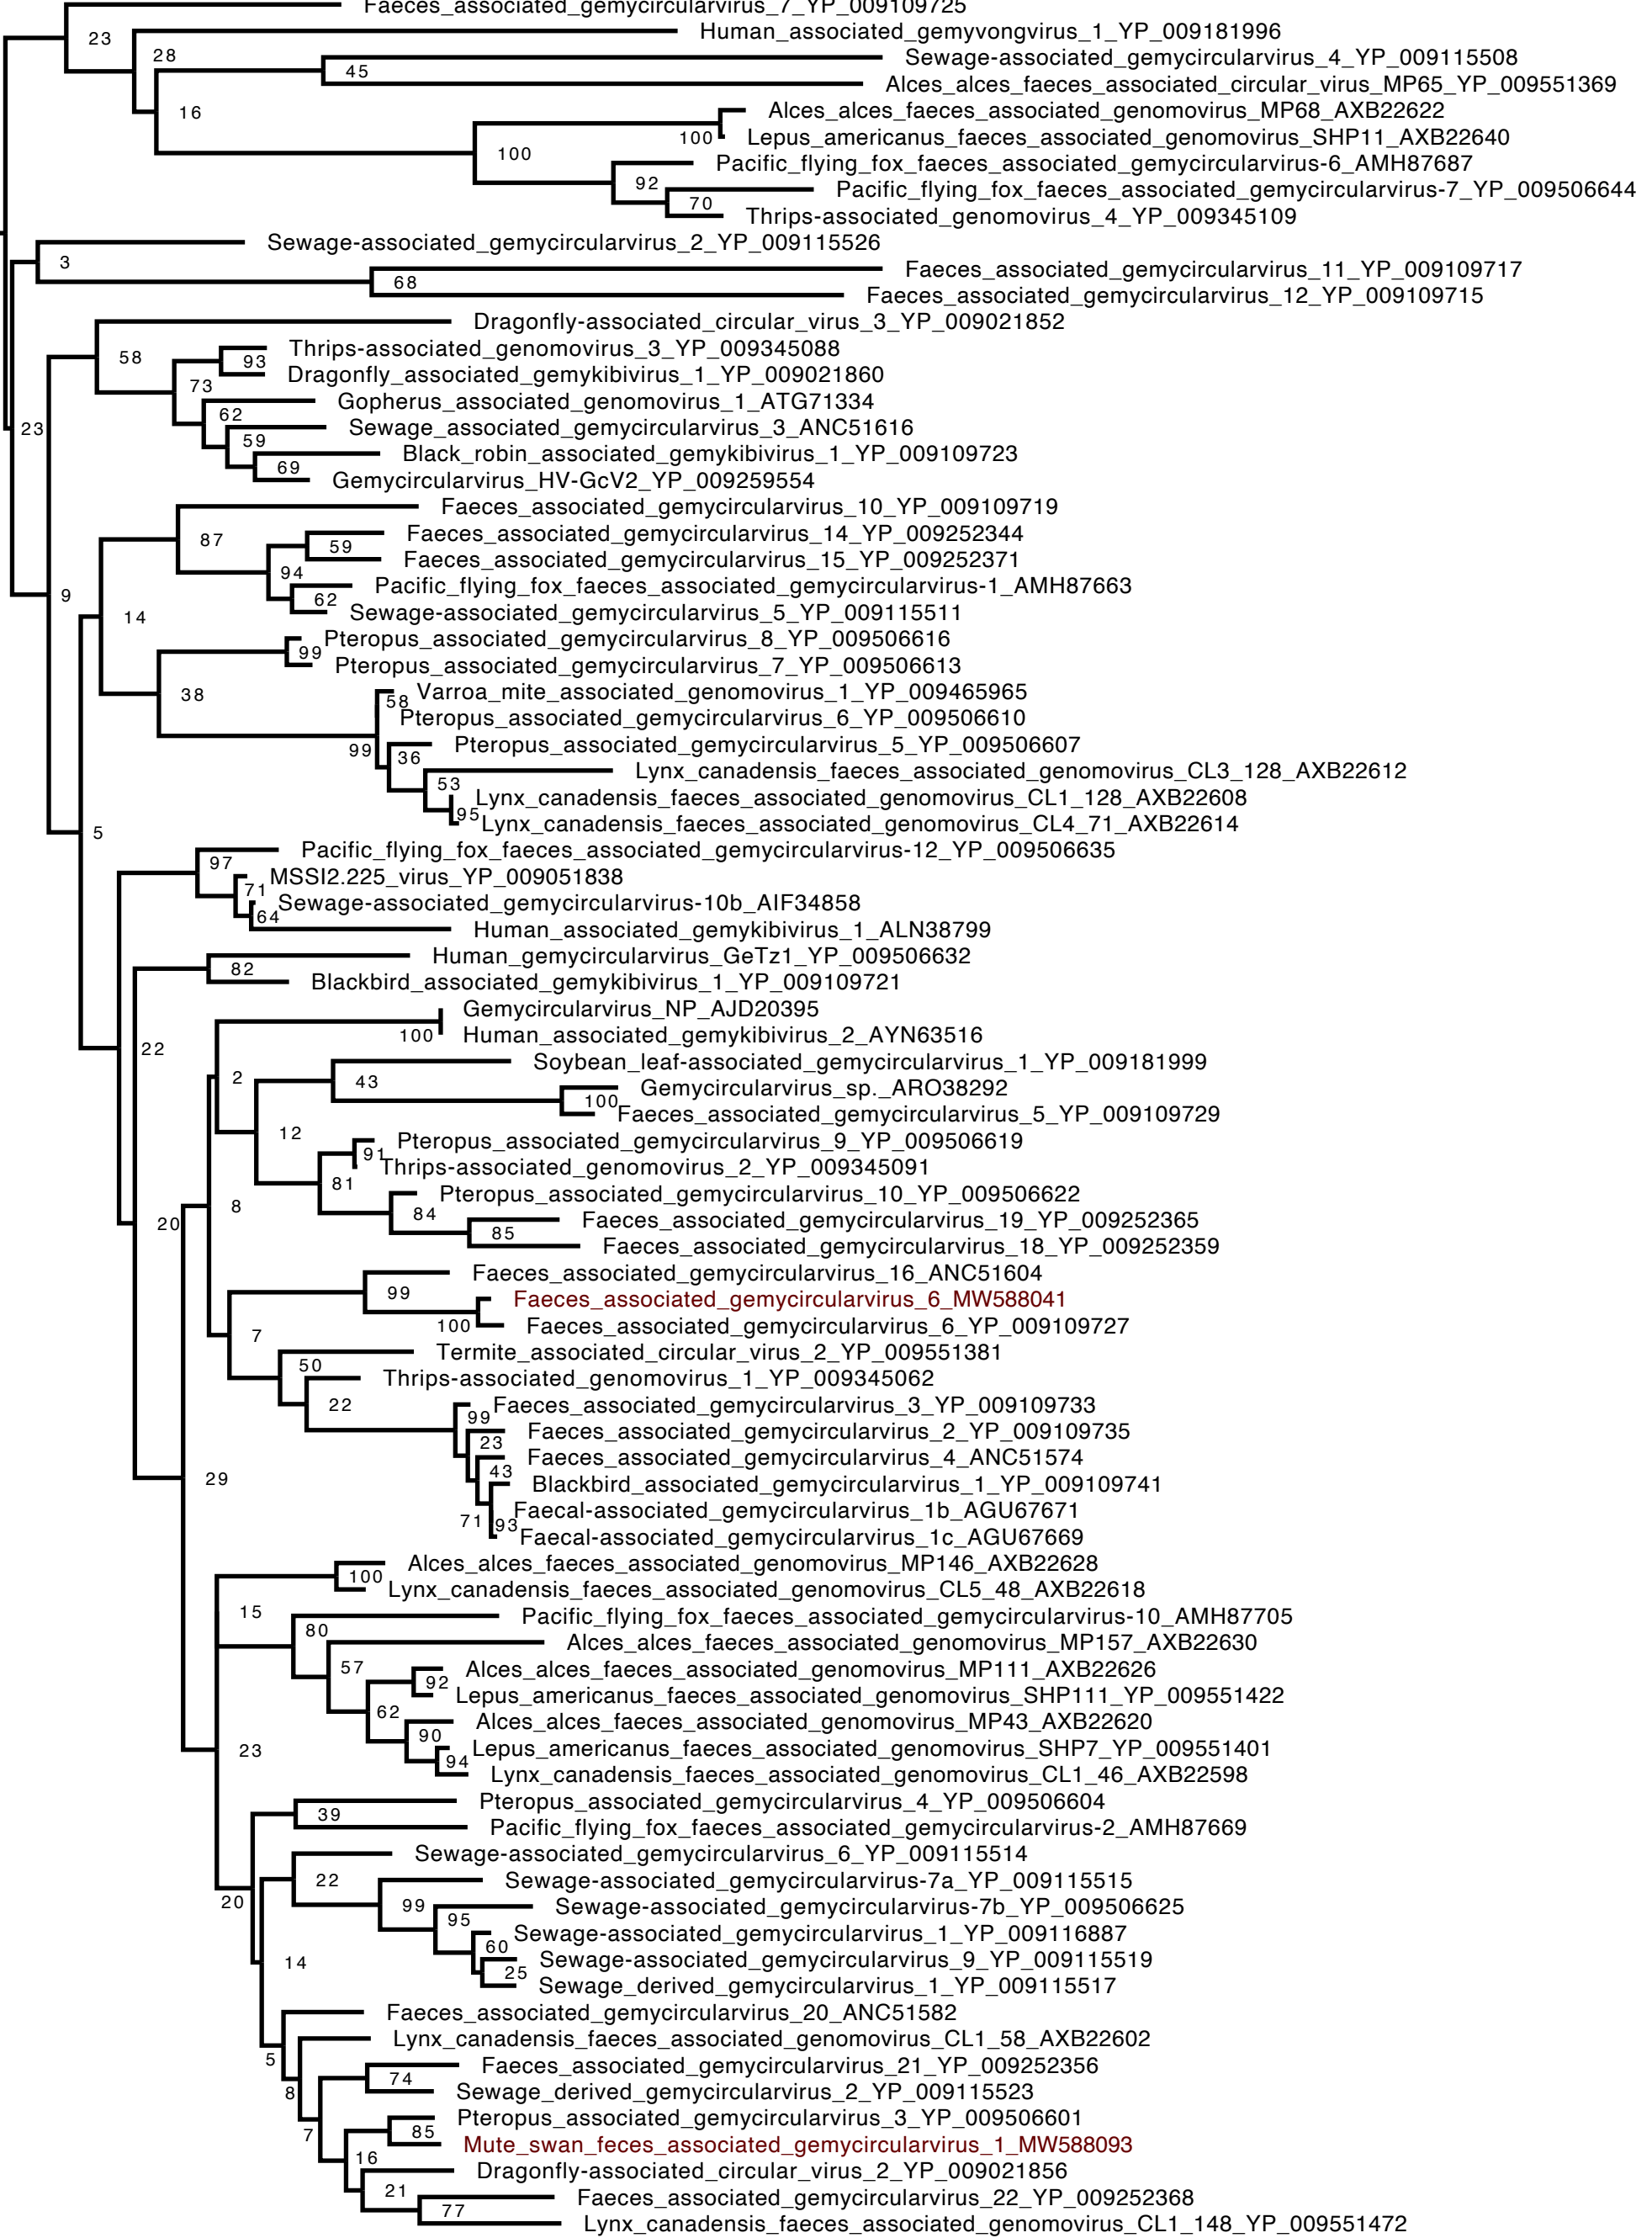

0.5
